# Supplementary material
Source: publisher figshare collection journal article supplement (https://gsapubs.figshare.com/ndownloader/files/23304293)
Supplement: Supplementary file 1 [file 23304293]

## Sheet: St 1 raw counts and conc.
STATION 1	Caloneis bacillum	Cosmioneis pusilla	Denticula subtilis	Diploneis ovalis	Diploneis pseudovalis	Frustulia vulgaris	Luticola mutica	Navicula cryptotenella	Navicula cincta	Nitzschia commutata	Nitzschia brevissima	Pinnularia lagerstedtii	Pinnularia intermedia	Caloneis westii	Diploneis smithii rhombica	Fallacia forcipata	Navicula peregrina	Navicula gregaria	Nitzschia scapelliformis	Nitzschia dubia	Planothidium lanceolatum	Rhopalodia musculus	Surirella brebissonii	Surirella ovalis	Tryblionella debilis	Actinoclyclus normanii	Actinoptychus senarius	Achnanthes brevipes	Actinocyclus ochotensis	Bacillaria paradoxa	Cocconeis scutellum	Delphineis kippae	Delphineis surirella	Gyrosigma eximium	Gyrosigma acuminatum	Hyalodiscus scoticus	Mastogloia exigua	Melosira moniliformis	Melosira nummuloides	Nitzschia sigma	Odontella aurita	Opephora marina	Petroneis marina	Planothidium delicatulum	Planothidium sp	Rhaphoneis psammicola	Synedra fasciculata	Thalassiosira antiqua	Thalassiosira pacifica
Classification	High marsh (FW&B)	High marsh (FW&B)	High marsh (FW&B)	High marsh (FW&B)	High marsh (FW&B)	High marsh (FW&B)	High marsh (FW&B)	High marsh (FW&B)	High marsh (FW&B)	High marsh (FW&B)	High marsh (FW&B)	High marsh (FW&B)	High marsh (FW&B)	Low marsh (B)	Low marsh (B)	Low marsh (B)	Low marsh (B)	Low marsh (B)	Low marsh (B)	Low marsh (B)	Low marsh (B)	Low marsh (B)	Low marsh (B)	Low marsh (B)	Low marsh (B)	Planktonic (M&B)	Planktonic (M&B)	Tidal flat (M&B)	Tidal flat (M&B)	Tidal flat (M&B)	Tidal flat (M&B)	Tidal flat (M&B)	Tidal flat (M&B)	Tidal flat (M&B)	Tidal flat (M&B)	Tidal flat (M&B)	Tidal flat (M&B)	Tidal flat (M&B)	Tidal flat (M&B)	Tidal flat (M&B)	Tidal flat (M&B)	Tidal flat (M&B)	Tidal flat (M&B)	Tidal flat (M&B)	Tidal flat (M&B)	Tidal flat (M&B)	Tidal flat (M&B)	Tidal flat (M&B)	Tidal flat (M&B)
NM/11/St 1 081711		18	106	11	8		41	69	34	13	5	25					8		1	0	22	2	1		40						5							3										6
NM/11/St 1 090211		13	51	5	12		11	19	9	7		16			4		31		10	0	25	45	7		52						3			9				69						35				13	10
NM/11/St 1 091411		15	61	1	6		36	4	5	8	2	26	6				23		2	0	32	16	8		55		5		1	5	5	2		6				27						16				26	28
NM/11/St 1 092811	2	13	72	9	11	2	37	32	6	6	3	16	2				18		3	5	21	34	18		50	2	1		3	4	11	4		8				38		8				26	7			33	31
NM/11/St 1 110711	6	10	64	14	28	4	33	31	11	5	4	8				5	24		7	4	17	21	11		47	6	2		2	11	4	3		23				42		12				21	11		4	28	23
NM/11/St 1 121411	6	13	69	8	15		25	18	4	14	7	21				2	26		8	3	15	23	10		42	9	5		5	4	12		2	11				23		3				17	8		3	32	22
NM/11/St 1 011212	4	11	61	10	4		18	11	11	20		20			5	7	19	16		5	26	13	15		35	2	4		2	8	21		16	3				16		2	6	7		19	22		2	32	14
NM/11/St 1 020912	1	16	41	13	20		27	33	8	24		18					13	20		12	11	9	12	4	37	2	3		3	11	23		11								3			14	7		4	27	22
NM/11/St 1 030912	6	13	33	5	26	13	31	13	5	4		3					31	9		4	19	11	9		32	6	5		3	13	15		3	3				15		11	4			23	11		6	39	27
NM/11/St 1 051612		23	16	9	10	7	29	8	5		9	16					14	20		16	14	8	31	10	12	2	4		1	19	21		9					18	5	14				13	9	2	11	22	20
NM/11/St 1 061912		18	3	5	12	2	45	13				20					26	11		10	11	5	42		13		5			11	18		8	3				41	30	2				14	13		5	29	25
NM/11/St 1 072412		16	6	4	6		11	10			5	8					18	21	3	37	2	10	34	11	9		6		2	12	11		11	2	22	1		90	46	2				18	15		7	22	18
NM/11/St 1 082912		14	5	7	8		16	6			2	12					21	17		35	18	8	37	12	16		4			26	34		9	2	17	2		86	39	3				34	8		15	23	21
NM/11/St 1 101112		12	7	3	4		10		13	3			11				11	26	24		16	7	25	10	13		5			19	30		10	21	16	3		68	44	4				33	9		11	26	22
NM/11/St 1 120812		9	3	2	1		8		11	4			5				10	29	17		10	17	24	14	9		4			22	37		13	22	15	4		66	46	5				25	10		5	23	19
NM/11/St 1 022713		6	2	2	1		6		10	3			4				37	32	13		12	15	26	15	13		7			18	34		15	16	13	3	14	39	26	9				21	11		4	25	21
NM/11/St 1 053113		5	9	3	2		7		9	2			6				24	24	12		5	35	22	13	11		3			14	25		13	21	16	4	10	21	24	11	3			25	13			23	25
NM/11/St 1 092413		5	2	4	2		2	12			3	2					36	16	1	12	7	52	25	6			2	3	4	10	26	5	16	11	12	3	48	23	22		4			26	11	2		29	24
NM/11/St 1 031214		3						8									38	7		14	5	18	15	12			14		5	15	21	7	16	12	16	4	13	13	10	13	7		3	12	9	4	7	19	21
NM/11/St. 1 031015			3	1			3	8				5		11			27	5		22	13	4	26	17	3		12		4	28	37	5	12	3	23	5		12	5	16	4			22	8		3	25	19
STATION 1
Sample date	total valves	no. of transects counted	total transects on slide	dripped volume (ml)	subsample volume (ml)	sediment weight (gram)	valve/grams	Mean post-restoration	1 SD	2 SD
2011-08-17	421	1	78	0.5	1	0.875	75058.3
2011-09-02	456	1	78	0.5	1	0.952	74722.7	76872.9	5228.44	10456.9
2011-09-14	427	1	78	0.5	1	0.928	71780.2
2011-09-28	536	1	78	0.5	1	1.12	74657.1
2011-11-07	546	1	78	0.5	1	1.059	80430.6
2011-12-14	489	1	78	0.5	1	1.013	75305
2012-01-12	487	1	78	0.5	1	0.927	81954.7
2012-02-09	449	1	78	0.5	1	0.942	74356.7
2012-03-09	451	1	78	0.5	1	0.896	78522.3
2012-05-16	445	1	78	0.5	1	0.924	75129.9
2012-06-19	456	1	78	0.5	1	1.024	69468.8
2012-07-24	517	1	78	0.5	1	1.068	75516.9
2012-08-29	572	1	78	0.5	1	1.187	75174.4
2012-10-11	532	1	78	0.5	1	0.939	88383.4
2012-12-08	507	1	78	0.5	1	1.048	75469.5
2013-02-27	492	1	78	0.5	1	0.916	83790.4
2013-05-31	461	1	78	0.5	1	0.958	75068.9
2013-09-24	479	1	78	0.5	1	0.855	87396.5
2014-03-12	382	1	78	0.5	1	0.794	75052.9
2015-03-10	417	1	78	0.5	1	0.951	68403.8
[truncated: 4 more columns]

## Sheet: St 2 raw counts and conc.
STATION 2	Caloneis bacillum	Cosmioneis pusilla	Denticula subtilis	Diploneis ovalis	Diploneis pseudovalis	Epithemia sp1	Eunotia pectinales	Fragilaria sp1 (vaucherie?)	Frustulia vulgaris	Gomphonema parvulum	Luticola mutica	Navicula cincta	Navicula cryptotenella	Nitzschia brevissima	Nitzschia commutata	Pinnularia intermedia	Pinnularia lagerstedtii	Pinnularia microstauron	Pinnularia viridis	Cavinula lapidosa	Stauroneis anceps	Caloneis westii	Diploneis smithii rhombica	Fallacia forcipata	Navicula gregaria	Navicula peregrina	Nitzschia dubia	Nitzschia scapelliformis	Planothidium lanceolatum	Rhopalodia musculus	Surirella brebissonii	Surirella ovalis	Tryblionella debilis	Navicula salinarium	Actinoclyclus normanii	Actinoptychus senarius	Achnanthes brevipes	Actinocyclus ochotensis	Bacillaria paradoxa	Cocconeis scutellum	Delphineis kippae	Delphineis surirella	Gyrosigma acuminatum	Gyrosigma eximium	Hyalodiscus scoticus	Mastogloia exigua	Melosira moniliformis	Melosira nummuloides	Nitzschia sigma
Classification	High marsh (FW&B)	High marsh (FW&B)	High marsh (FW&B)	High marsh (FW&B)	High marsh (FW&B)	High marsh (FW&B)	High marsh (FW&B)	High marsh (FW&B)	High marsh (FW&B)	High marsh (FW&B)	High marsh (FW&B)	High marsh (FW&B)	High marsh (FW&B)	High marsh (FW&B)	High marsh (FW&B)	High marsh (FW&B)	High marsh (FW&B)	High marsh (FW&B)	High marsh (FW&B)	High marsh (FW&B)	High marsh (FW&B)	Low marsh (B)	Low marsh (B)	Low marsh (B)	Low marsh (B)	Low marsh (B)	Low marsh (B)	Low marsh (B)	Low marsh (B)	Low marsh (B)	Low marsh (B)	Low marsh (B)	Low marsh (B)	Low marsh (B)	Planktonic (M&B)	Planktonic (M&B)	Tidal flat (M&B)	Tidal flat (M&B)	Tidal flat (M&B)	Tidal flat (M&B)	Tidal flat (M&B)	Tidal flat (M&B)	Tidal flat (M&B)	Tidal flat (M&B)	Tidal flat (M&B)	Tidal flat (M&B)	Tidal flat (M&B)	Tidal flat (M&B)	Tidal flat (M&B)
NM/11/St 2 081711		18	17	12		8	9		3	24	20		7	12	15	23	13	36	29	3	11	5					2	6		2	2				2			2		3	5	5							2
NM/11/St 2 090211		13	2								3			15	14	21	11	27	31	4	59	9				14	24	16	4	5	23	18			6	4				8	8	10			4				13
NM/11/St 2 091411		9	3								4		9	16	26	17	14	20	23	6	42	8			15	22	28	12	25	8	21	11			2	1				11	11	3							21
NM/11/St 2 092811		12								4			11	18	30	10	6	13	12	8	38	7			13	20	10	10	18	13	31	10			2	4				5	9	13			5				22
NM/11/St 2 110711		10					14			6			3	13	38	21	9	22	21	7	29	8			6	19	14	9	24	11	18	8			3	3				4	6	17							13
NM/11/St 2 121411		4							4				7	9	33	8	2	15	13	4	25	8			8	11	27	4	20	6	24	7	3		5	2				9	9	12			3		3		8
NM/11/St 2 011212		5							8				5	14	31	14	9	18	15	14	33	5			18	10	31	27	21	8	19	4	4		4	3		3		5	8	10	3						5
NM/11/St 2 020912		8									3		6	13	35	13	4	16	13	11	14	3			14	13	13	23	23	3	11	2	6		7	6				4	10	13	2		3		16	9	4
NM/11/St 2 030912		10									7		3	16	36	15	8	20	5	13	24	3			28	14	33	22	18	1	17		10		6	5			2	10	11	12			7		20	12	7
NM/11/St 2 051612		11									15			11	37	11	4	13	15	14	21	7	5		8	11	17	20	20		16		8		9	5			6	12	8	9			4		31	22	6
NM/11/St 2 061912		12									7			6	24	17	14	19	15	13	19	5	9		5	5	4	8	5		8	1	10		8	7			12	17	9	12			6		10	8	5
NM/11/St 2 072412		15									10			9	36	21	9	14	17	14	20	9	6		6	13	3	11	3		11	3	8		6	5			8	15	8	7			7		8	5	4
NM/11/St 2 082912		18						22			18			26	20	6	17	13	14	8	14	2	2	3	33	23	2	24	21		31	6	4		9				10	22	2	3					32	17	9
NM/11/St 2 101112		22						11		7	25			22	13	13	16	16	12	7	10	3		6	31	17	4	15	18		21	4	5		5				13	19	4	5	1	1			9	8	4
NM/11/St 2 120812		24						7		8	26			13	9	9	13	11	10	6	8	2		8	33	18	6	9	15		25	9	6		6				21	23	5	6	3	4			17	14	5
NM/11/St 2 022713		14						5		4	22			9	5	8	10	8	6	3	6	1		6	31	39	7	8	14		28	11	7		5				17	30	7	8	9	9			16	13	4
NM/11/St 2 053113		16						3		5	18			5	4	6	9	9	8	1	7	3		7	32	48	5	3	13		24	8	9		2				18	26	6	10	10	7			18	17	4
NM/11/St 2 092413		21						4			23			4	3	3	14	4	2	3	9	3		13	31	56	5	4	16		27	4	10	13	2		11		16	29	4	11	9	8			16	9	3
NM/11/St 2 031214		16						6			20			2	4	2	1	2	3	4	11	4		9	29	53	3	5	14		21	3	6	15	3		9		15	23	5	8	6	7			13	11	1
NM/11/St 2 090414		10						8	3		11			3	4	1	3	1	2	2	7	3		7	21	49	1	3	16		23	5	7	17	3		12		14	26	7	8	21	10			14	7	1
STATION 2
Sample date	total valves	no. of transects counted	total transects on slide	dripped volume (ml)	subsample volume (ml)	sediment weight (gram)	valve/grams	Mean post-restoration	1 SD	2 SD
2011-08-17	307	1	78	0.5	1	0.997	48036.1
2011-09-02	382	1	78	0.5	1	1.015	58711.3	66753.1	7360.26	14720.5
2011-09-14	421	1	78	0.5	1	1.023	64199.4
2011-09-28	403	1	78	0.5	1	0.985	63825.4
2011-11-07	388	1	78	0.5	1	1.015	59633.5
2011-12-14	352	1	78	0.5	1	0.899	61081.2
2012-01-12	409	1	78	0.5	1	0.979	65172.6
2012-02-09	386	1	78	0.5	1	1.078	55859
2012-03-09	472	1	78	0.5	1	0.967	76144.8
2012-05-16	438	1	78	0.5	1	1.12	61007.1
2012-06-19	379	1	78	0.5	1	0.899	65766.4
2012-07-24	364	1	78	0.5	1	1	56784
2012-08-29	512	1	78	0.5	1	1.093	73075.9
2012-10-11	452	1	78	0.5	1	0.879	80218.4
2012-12-08	474	1	78	0.5	1	0.953	77590.8
2013-02-27	473	1	78	0.5	1	1.089	67757.6
2013-05-31	462	1	78	0.5	1	1.055	68314.7
2013-09-24	494	1	78	0.5	1	0.978	78797.5
2014-03-12	425	1	78	0.5	1	0.928	71444
2014-09-04	407	1	78	0.5	1	1.009	62925.7
[truncated: 14 more columns]

## Sheet: St 3 raw counts and conc.
STATION 3	Cavinula lapidosa	Cosmioneis pusilla	Denticula subtilis	Diploneis ovalis	Diploneis pseudovalis	Epithemia sp1	Eunotia pectinales	Frustulia vulgaris	Gomphonema parvulum	Luticola mutica	Navicula cincta	Navicula cryptotenella	Nitzschia brevissima	Nitzschia commutata	Pinnularia intermedia	Pinnularia lagerstedtii	Pinnularia microstauron	Pinnularia viridis	Caloneis westii	Diploneis smithii rhombica	Fallacia forcipata	Navicula peregrina	Navicula gregaria	Nitzschia dubia	Nitzschia scapelliformis	Planothidium lanceolatum	Rhopalodia musculus	Surirella brebissonii	Surirella ovalis	Tryblionella debilis	Actinoclyclus normanii	Actinoptychus senarius	Paralia sulcata	Achnanthes brevipes	Actinocyclus ochotensis	Bacillaria paradoxa	Cocconeis scutellum	Delphineis kippae	Delphineis surirella	Gyrosigma acuminatum	Gyrosigma eximium	Hyalodiscus scoticus	Mastogloia exigua	Melosira moniliformis	Melosira nummuloides	Nitzschia sigma	Odontella aurita	Opephora marina	Petroneis marina
Classification	High marsh (FW&B)	High marsh (FW&B)	High marsh (FW&B)	High marsh (FW&B)	High marsh (FW&B)	High marsh (FW&B)	High marsh (FW&B)	High marsh (FW&B)	High marsh (FW&B)	High marsh (FW&B)	High marsh (FW&B)	High marsh (FW&B)	High marsh (FW&B)	High marsh (FW&B)	High marsh (FW&B)	High marsh (FW&B)	High marsh (FW&B)	High marsh (FW&B)	Low marsh (B)	Low marsh (B)	Low marsh (B)	Low marsh (B)	Low marsh (B)	Low marsh (B)	Low marsh (B)	Low marsh (B)	Low marsh (B)	Low marsh (B)	Low marsh (B)	Low marsh (B)	Planktonic (M&B)	Planktonic (M&B)	Planktonic (M&B)	Tidal flat (M&B)	Tidal flat (M&B)	Tidal flat (M&B)	Tidal flat (M&B)	Tidal flat (M&B)	Tidal flat (M&B)	Tidal flat (M&B)	Tidal flat (M&B)	Tidal flat (M&B)	Tidal flat (M&B)	Tidal flat (M&B)	Tidal flat (M&B)	Tidal flat (M&B)	Tidal flat (M&B)	Tidal flat (M&B)	Tidal flat (M&B)
NM/11/St 3 081711	4	19	6	14		6	16	3	15	16		7	12	29	29	17	34	26	8					1	2		0	3					34					3	3							3
NM/11/St 3 090211	3	22	2	5		2	18		2	11			5	34	31	16	27	14	3													3	27					5	2							11	4
NM/11/St 3 091411	4	16	1	11		1	9		1	8				36	27	26	29	17	8													2	28					3	3							9	8	3
NM/11/St 3 092811	2	18	3	6		1	6		3	5				39	25	32	36	13	9	4													32				5	1	2							4	7
NM/11/St 3 110711	5	22	1	5		3	5		2	3				37	29	26	33	12	11	5		3										5	32				3	0	2							1	3
NM/11/St 3 121411	3	25	2	6		4	3		2	1				41	33	28	34	14	10	3		9	5									2	29				4	1	4							3	5
NM/11/St 3 011212	2	21	1	4		3	2			2				42	28	29	31	11	12			7	6			3						1	30				9	2	6							7	4	3
NM/11/St 3 020912	2	18	4	3		2	2			3				46	31	26	28	10	10			4	5	2		3						2	31				7	4	5							9	4	2
NM/11/St 3 030912	4	19	3	3		1	5			7				43	27	22	25	6	14	5		7	9	7		10		4				3	27				8	4	6							10	6	1
NM/11/St 3 051612	3	21	1	4		5	4			19				40	35	20	21	13	12	3		6	8	3	6	13		2				1	22				8	5	4							9	5	3
NM/11/St 3 061912	5	26	4	6		3	5			24				41	31	17	18	15	9	2		5	10	4	8	12		4					19		3		4	4	5							5	8	1
NM/11/St 3 072412	4	25	3	3		3	3			25				39	30	21	17	10	13	4		11	12	3	7	10		2				1	21		3		8	5	6							4	9	3
NM/11/St 3 082912	5	24	4	2		1	4			22				37	29	23	16	9	11	3		6	14	2	9	14		3		9		2	26		3		7	4	5							10	7	4
NM/11/St 3 101112	6	30	4	3		2	3			31				27	25	26	14	6	8	2		18	14	7	13	10		5		7		3	16		3		10	4	6							6	5	4
NM/11/St 3 120812	7	28	6	3		1	2			34				26	22	25	16	8	9	2		23	20	10	14	9		8		8		2	21		4		13	5	8							7	3	6
NM/11/St 3 022713	2	27	5	2		1	2			33				27	24	22	14	6	8	3		29	22	11	13	7		18		13		3	18		3		16	4	10							6	3	7
NM/11/St 3 053113	3	30	4	3		1	1			31				24	28	32	12	8	7	2		25	23	12	10	8		17		15		4	22		3		17	5	11					4		8	2	6
NM/11/St 3 092413	3	31	7	0		0	0			37				28	27	29	15	11	9	2		21	26	9	12	8		19		14		3	25		4		15	5	7			3				9	2	8
NM/11/St 3 031214	3	34	8	6		2	3			40				30	23	36	13	7	4	3		25	34	11	14	9		21		17		2	23		5		16	6	13		8	2				8	2	7
NM/11/St 3 090414	0	32	6	4		0	0			36				28	16	33	11	6	3	4		21	31	14	12	11		17		22		2	24		1		12	5	11		7	1		5		5	6	8
STATION 3
Sample date	total valves	no. of transects counted	total transects on slide	dripped volume (ml)	subsample volume (ml)	sediment weight (gram)	valve/grams	Mean post-restoration	1 SD	2 SD
2011-08-17	285	4	78	0.75	1	1.02	7264.71
2011-09-02	234	4	78	0.75	1	0.945	6438.1	7577.85	1356.31	2712.62
2011-09-14	237	4	78	0.75	1	1.025	6011.71
2011-09-28	230	4	78	0.75	1	1.1	5436.36
2011-11-07	231	4	78	0.75	1	0.987	6085.11
2011-12-14	261	4	78	0.75	1	0.959	7076.12
2012-01-12	251	4	78	0.75	1	1.001	6519.48
2012-02-09	250	4	78	0.75	1	1.07	6074.77
2012-03-09	274	4	78	0.75	1	1.032	6903.1
2012-05-16	292	4	78	0.75	1	0.991	7660.95
2012-06-19	295	4	78	0.75	1	1	7670
2012-07-24	302	4	78	0.75	1	1.006	7805.17
2012-08-29	309	4	78	0.75	1	1.17	6866.67
2012-10-11	329	4	78	0.75	1	1.104	7748.19
2012-12-08	358	4	78	0.75	1	1.089	8547.29
2013-02-27	386	4	78	0.75	1	1.118	8976.74
2013-05-31	405	4	78	0.75	1	1.16	9077.59
2013-09-24	421	4	78	0.75	1	1.17	9355.56
2014-03-12	461	4	78	0.75	1	1.136	10551.1
2014-09-04	415	4	78	0.75	1	1.176	9175.17
[truncated: 10 more columns]
